# Supplementary material
Source: HighWire-hosted journal article supplement (https://www.genetics.org/content/suppl/2017/06/05/genetics.116.198838)

**A**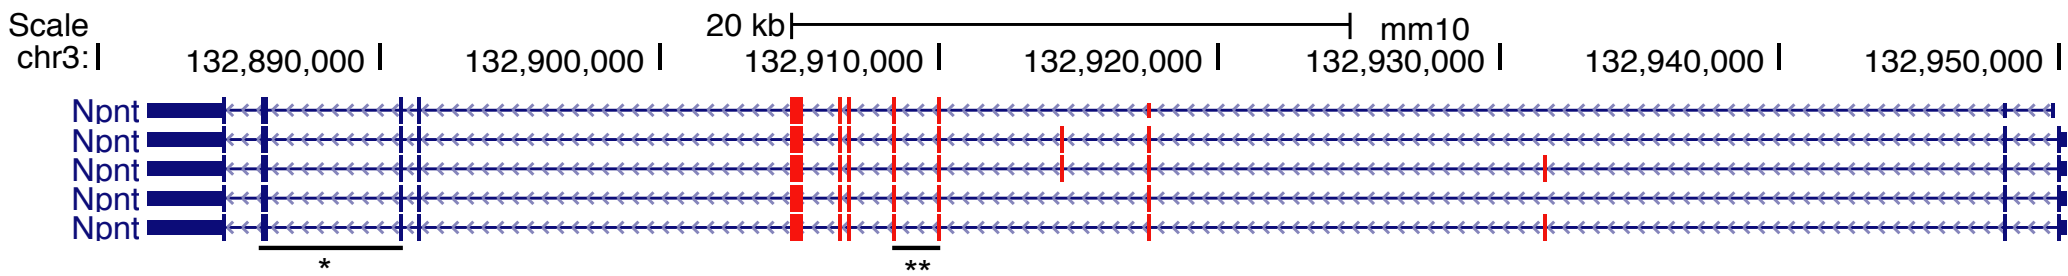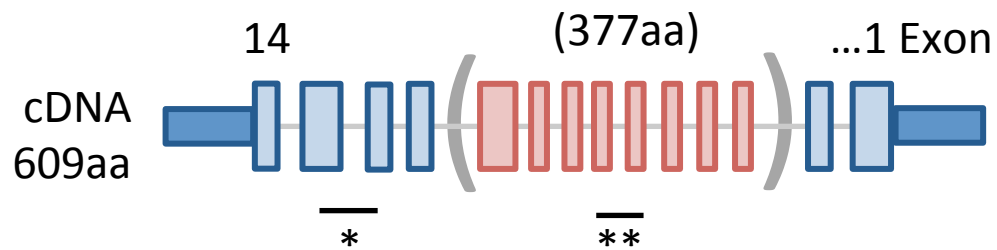**B**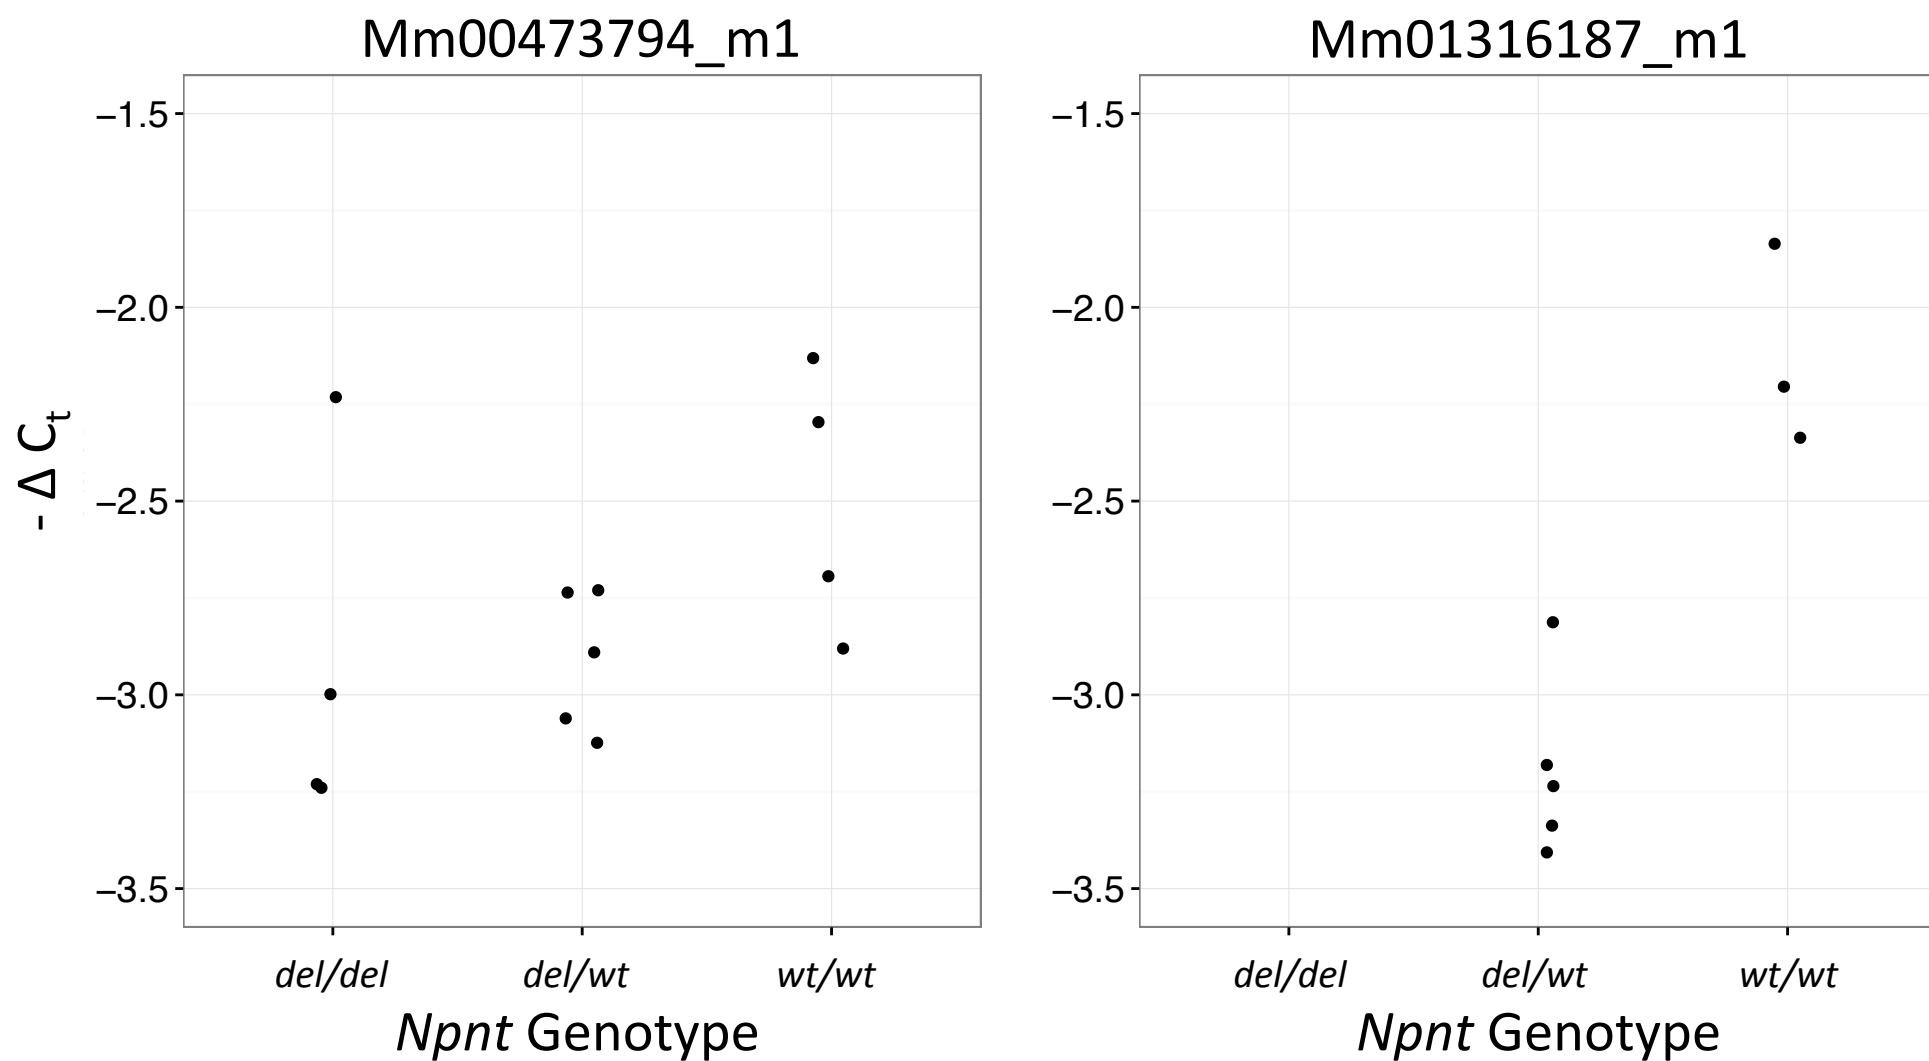

Supplement: FigureS7.pdf [file FigureS7.pdf]
